# Supplementary material for: Force Engages Vinculin and Promotes Tumor Progression by Enhancing PI3K Activation of Phosphatidylinositol (3,4,5)-Triphosphate
Source: Oxford University Press journal article supplement (doi:10.1158/0008-5472.can-13-3698), 2014-09-01
Supplement: 00085472can133698-sup-124694_1_supp_2368838_n1zd1k.xls [file 00085472can133698-sup-124694_1_supp_2368838_n1zd1k.xls]

## Sheet: Sheet1
Adhesome	Oncogenes	Control
ABI1	ABL1	TSPAN6
ABL1	AKT1	TNMD
ACTB	ALK	DPM1
ACTN1	AR	SCYL3
ADAM12	BCL2	C1orf112
AKT1	BRAF	FGR
ARF1	CARD11	CFH
ARHGAP24	CBL	FUCA2
ARHGAP26	CSF1R	GCLC
ARHGAP5	CTNNB1	NFYA
ARHGEF6	DNMT1	STPG1
ARPC2	DNMT3A	NIPAL3
BCAR3	EGFR	LAS1L
CALR	ERBB2	ENPP4
CAPN1	EZH2	SEMA3F
CAV1	FGFR2	CFTR
CBL	FGFR3	ANKIB1
CD47	FLT3	CYP51A1
CEACAM1	GATA2	KRIT1
CFL1	GNA11	BAD
CRK	GNAQ	LAP3
CRKL	GNAS	CD99
CSK	HIST1H3B	HS3ST1
CSRP1	HRAS	AOC1
CTTN	IDH1	WNT16
DNM2	IDH2	HECW1
DOCK1	JAK1	MAD1L1
ELMO1	JAK2	LASP1
ENAH	KIT	SNX11
ENG	KLF4	TMEM176A
FBLIM1	MAP2K1	M6PR
FHL2	MED12	KLHL13
FLNA	MET	CYP26B1
FYN	MPL	ICA1
GNB2L1	MYD88	DBNDD1
GRB2	NFE2L2	ALS2
GRB7	NRAS	CASP10
HRAS	PDGFRA	CFLAR
HSPA2	PIK3CA	TFPI
HSPB1	PPP2R1A	NDUFAF7
ILK	PTPN11	RBM5
ILKAP	RET	MTMR7
INPP5D	SF3B1	SLC7A2
INPPL1	SMO	SARM1
INSR	SPOP	PLXND1
IRS1	SRSF2	AK2
ITGA5	TSHR	CD38
ITGB1	U2AF1	FKBP4
ITGB3BP	APC	KDM1A
JUB	ARID1A	RBM6
KCNH2	ARID1B	CAMKK1
KEAP1	ATM	RECQL
KTN1	ATRX	CCDC132
LASP1	AXIN1	HSPB6
LAYN	B2M	ARHGAP33
LIMK1	BAP1	SLC22A16
LPP	BRCA1	ZMYND10
LPXN	BRCA2	ABCB5
LRP1	CASP8	SLC25A13
LYN	CDC73	ST7
MAPK1	CDH1	ST7
MAPK8	CDKN2A	CDC27
MAPK8IP3	CIC	SLC4A1
MARCKS	CREBBP	CALCR
NCK2	CYLD	HCCS
NEXN	DAXX	DVL2
NF2	EP300	PRSS22
NUDT16L1	FBXW7	UPF1
OSTF1	FUBP1	SKAP2
PABPC1	GATA1	CCDC109B
PAK1	GATA3	HOXA11
PARVA	HNF1A	POLR2J
PDPK1	KDM6A	MEOX1
PFN1	MAP3K1	THSD7A
PIK3CA	MEN1	LIG3
PIP5K1C	MLH1	RPAP3
PKD1	MLL2	ACSM3
PLAUR	MSH2	AC004381.6
PLCG1	MSH6	CIAPIN1
PLD1	NCOR1	FAM214B
PPFIA1	NF1	COPZ2
PPM1M	NF2	PRKAR2B
PPP2CA	NOTCH1	MSL3
PRKACA	NOTCH2	CREBBP
PRKCA	NPM1	BZRAP1
PTEN	PAX5	MPO
PTK2	PBRM1	PON1
PTK2B	PHF6	WDR54
PTPN1	PIK3R1	CROT
PTPN11	PRDM1	ABCB4
PTPN12	PTCH1	RHBDD2
PTPN2	PTEN	SOX8
PTPN6	RB1	IBTK
PTPRA	RNF43	ZNF195
PTPRF	SETD2	MYCBP2
PTPRH	SMAD2	ITGAL
PTPRO	SMAD4	PDK2
PXN	SMARCA4	ITGA3
RAC1	SMARCB1	ZFX
RAPGEF1	SOCS1	LAMP2
RASA1	SOX9	GGNBP2
RAVER1	STAG2	ITGA2B
RHOA	STK11	ASB4
ROCK1	TET2	C19orf60
SDC4	TNFAIP3	CRLF1
SDCBP	TRAF7	OSBPL7
SH3KBP1	TP53	TMEM98
SHC1	TSC1	YBX2
SIRPA	VHL	ABCC8
SLC9A1	WT1	SYNRG
SORBS1		TMEM132A
SORBS2		AP2B1
SORBS3		TAC1
SOS1		ZNF263
SRC		ZNF263
STAT3		CX3CL1
SYK		SPATA20
TES		CACNA1G
TESK1		TNFRSF12A
TGFB1I1		DLX6
THY1		MAP3K9
TIAM1		BAIAP2L1
TLN1		JHDM1D
TNS1		AGK
TRIO		TTC22
TRIP6		PHTF2
TRPM7		FARP2
VASP		USH1C
VAV1		GGCT
VCL		IFRD1
VIM		COX10
ZYX		GTF2IRD1
		PAF1
		VPS41
		ARHGAP44
		ELAC2
		SCIN
		ARSD
		PNPLA4
		MYH13
		ADIPOR2
		CDKL3
		UPP2
		PRSS21
		MARK4
		PROM1
		CCDC124
		CEACAM21
		PAFAH1B1
		NOS2
		DNAH9
		KIAA0100
		SLC13A2
		GAS7
		TRAPPC6A
		MATK
		CD79B
		SCN4A
		ST7L
		TKTL1
		PAX6
		RPUSD1
		LUC7L
		CACNA2D2
		BAIAP3
		TSR3
		PIGQ
		CRAMP1L
		TEAD3
		SELE
		DNAJC11
		FMO3
		NOX1
		E2F2
		PSMB1
		SYN1
		JARID2
		CDKL5
		CAMK1G
		CDK11A
		CDK11A
		NADK
		TFAP2B
		TFAP2D
		DLEC1
		CYTH3
		ADAM22
		SYPL1
		CYB561
		SPAG9
		AASS
		PLEKHG6
		SS18L2
		MPND
		MGST1
		CRY1
		PGLYRP1
		ST3GAL1
		MMP25
		IL32
		PKD1
		PKD1
		MAPK8IP2
		MED24
		HEATR5B
		SEC62
		RPS20
		RPS20
		CSDE1
		UBE3C
		TENM1
		MASP2
		FAM76A
		TRAF3IP3
		POMT2
		VTA1
		BAZ1B
		RANBP9
		ETV7
		SPRTN
		METTL13
		DYRK4
		ZNF207
		UQCRC1
		STARD3NL
		CD9
		HHATL
		NCAPD2
		GIPR
		PHF7
		SEMA3G
		NISCH
		STAB1
		FUZ
		ZNF200
		CD4
		LRRC23
		BTK
		HFE
		SCMH1
		FYN
		FMO1
		TCEB3
		CLCN6
		MRC2
		NME2
		NME2
		SLC6A7
		TSPAN9
		BTBD7
		APBA3
		MKS1
		ABHD5
		AKAP8L
		MBTD1
		UTP18
		RNF216
		TTC19
		PTBP1
		PTBP1
		DPF1
		SYT7
		LARS2
		PIK3C2A
		PLAUR
		WIZ
		DCN
		QPCTL
		PPP5C
		CEP68
		MAP4K3
		TYROBP
		TMEM159
		GABRA3
		BRCA1
		ERCC1
		CD22
		MBTPS2
		PRICKLE3
		LTF
		EXTL3
		NR1H4
		ELOVL5
		ALOX5
		CALCOCO1
		UBR7
		MAP4K5
		PSMC4
		MAN2B2
		SLC7A14
		CLDN11
		SLC25A39
		MVP
		NUB1
		PGM3
		RWDD2A
		CLK1
		POLR3B
		ANGEL1
		RNF14
		HEBP1
		GPRC5A
		MAMLD1
		CD6
		TACC3
		UFL1
		POLA2
		ZC3H3
		CAPN1
		ACPP
		MDH1
		SLC30A9
		MTMR11
		COX15
		CCDC88C
		YAF2
		ZMYND11
		WAS
		DPEP1
		BID
		MATR3
		MATR3
		NPC1L1
		XYLT2
		STMN4
		NUDCD3
		CHDH
		IL20RA
		CLCA1
		CLCA4
		GLT8D1
		ATP2C1
		SRCIN1
		IGF1
		SLC38A5
		MAGIX
		RALBP1
		RUFY3
		CNTN1
		SLC11A1
		WWTR1
		AGPS
		CXorf56
		ATP1A2
		TTC27
		ZNF582
		VSIG2
		PHLDB1
		MARCO
		CYP24A1
		PRDM11
		PRDM11
		SYT13
		SNAI2
		CD74
		HGF
		ZRANB1
		NCDN
		GPR124
		ZFP64
		MNAT1
		SAMD4A
		RUNX3
		MRE11A
		SERPINB1
		SLC7A9
		SPAST
		NRXN3
		OSBPL5
		CPS1
		C8B
		FHL1
		RTFDC1
		GABRA1
		NLRP2
		SLC45A4
		RNF10
		ZNF839
		ZDHHC6
		GRAMD1B
		RNH1
		RB1CC1
		ERP44
		ALAS1
		BIRC3
		AKAP11
		GLRX2
		STRAP
		ABCC2
		DEF6
		GCLM
		UBR2
		DEPDC1
		CCDC28A
		HSF2
		PHF20
		NR1H3
		TYMP
		TOMM34
		SEC63
		KPNA6
		VIM
		FAS
		RNASET2
		CD44
		KCNG1
		AGPAT4
		SLAMF7
		BTN3A1
		MIPEP
		PRKCH
		INSRR
		IFNGR1
		B4GALT7
		VRK2
		TNFRSF1B
		VEZT
		POU2F2
		BRD9
		SNX1
		BCLAF1
		SLC39A9
		ANK1
		TFB1M
		RABEP1
		BAK1
		GRN
		FAM13B
		ARHGAP31
		SARS
		RANBP3
		ARID4A
		TSSC1
		PNPLA6
		IFT88
		ZCCHC8
		ABCF2
		CHPF2
		LRRC7
		FUT8
		UBA6
		GAB2
		ATP6V0A1
		PIAS1
		SLC4A7
		APBA2
		MAP2K3
		MAP2K3
		EFCAB1
		ASTE1
		RNF19A
		PEX3
		GABARAPL2
		MYOC
		SH3YL1
		FAM136A
		VCL
		DEPDC1B
		NSMAF
		ADSS
		STAP1
		TIMP2
		RFC1
		TBC1D23
		CUL3
		MYOM2
		OTC
		CYP46A1
		SLC18A1
		USP2
		CASR
		TUBG2
		RPL26L1
		NSUN2
		FBXO42
		MFAP3
		MRI1
		METTL1
		HOXC8
		AGA
		PI4K2B
		PI4K2B
		BOD1L1
		MAT2B
		EDC4
		TRIO
		VCAN
		CLEC16A
		MSR1
		CDH1
		SKIV2L2
		DNAH5
		ZFYVE16
		FAM65A
		C6
		RAI14
		SOX30
		PNKP
		BEST2
		PHLPP2
		SPDL1
		STAU2
		RTN4R
		PHF23
		CDH10
		INPP4A
		RAB27B
		PSMA4
		MYO16
		LSG1
		TNC
		THAP3
		FAM65C
		AIFM2
		C2orf83
		SPATA7
		RETSAT
		CAPG
		TG
		BARX2
		DCUN1D1
		PHF15
		LCP2
		TRIT1
		CUL7
		CTNNA1
		PHKA2
		CNTLN
		EPHA3
		HSPA5
		DSG2
		GEMIN8
		OFD1
		GPM6B
		MAGEC2
		PREX2
		WDR37
		YTHDC2
		CTPS2
		ATP6V1H
		POLR2B
		FAM214A
		ARAP2
		TPR
		CP
		KIAA0556
		DTNBP1
		XK
		ANO2
		C12orf4
		SCML1
		WWC3
		ARHGAP6
		FAM184B
		MAP4
		GOPC
		ROS1
		USP28
		HDAC9
		NOP16
		CC2D2A
		RRM2B
		ZNF800
		TNFRSF17
		SNX29
		MRPS10
		RSF1
		VPS13D
		CELF2
		FAM120A
		R3HDM1
		COL9A2
		KITLG
		ADAMTS6
		H6PD
		PER3
		UTS2
		TNFRSF9
		EPN3
		LTBP1
		RCN1
		RCN1
		ELN
		RFC2
		ARID1B
		CLPTM1L
		NEDD4L
		FOXP3
		PPP1R3F
		HEXB
		PTCD2
		KIAA2022
		JKAMP
		DKK3
		ARHGEF5
		ARHGEF5
		NFE2L3
		MCUR1
		LIMA1
		SLC4A8
		PTGER3
		TNIP3
		MAPK9
		BCAR1
		HERPUD1
		HOMER3
		RAD51
		POLQ
		PIK3CB
		CYBA
		THOC3
		HEBP2
		MPHOSPH9
		PLEKHA5
		PRSS8
		SIKE1
		FNIP2
		TTC17
		FSTL4
		METTL24
		AKR7A2
		MRTO4
		USE1
		MCF2L2
		NRIP2
		LAMA3
		ANAPC4
		KCNQ1
		TRAPPC3
		THRAP3
		PHPT1
		ENTPD2
		LY75
		LY75
		ARID4B
		OPN3
		SDCCAG8
		PTPRN
		HHAT
		KIF1B
		FOXC1
		TBC1D22A
		SYNE2
		PLEKHH1
		ATP9A
		CHRDL2
		FAM168A
		GALC
		NOP58
		SZRD1
		KCNH2
		CUL1
		FAM114A2
		CYFIP2
		GINM1
		EIF2AK2
		USP36
		MCOLN3
		CCDC85A
		PUM2
		ITIH4
		ITIH1
		C4orf27
		ZFR
		NPFFR2
		PHF21B
		PHF21B
		TRAF1
		RC3H2
		PCGF2
		IL17RB
		TRAF3IP2
		GYG2
		DCBLD2
		SERPINB3
		SOAT1
		PKP2
		MSH4
		F7
		GDI2
		PRDM1
		ATG5
		TMCC3
		PITHD1
		MTA3
		USP13
		ATP11B
		LAMC2
		CDK14
		SEC61A1
		PPP1R12A
		RASGRF1
		CAMK2B
		CROCC
		POLR3E
		POLR3E
		ATP2B4
		ZC3H11A
		ZC3H11A
		RIOK2
		YIPF1
		DGKG
		FLYWCH1
		PARP12
		ALDH18A1
		TARBP1
		PET112
		MXD1
		CDK17
		DNAJC25
		DNAJC25
		SLC2A3
		CTDP1
		YBX3
		STYK1
		CCAR1
		OGFR
		GNA15
		CREB3L3
		PTPRU
		SNRNP40
		RIMBP2
		QSER1
		MPC1
		ACAA1
		BCAT1
		HDAC7
		LZTS1
		PRDM6
		WNT8A
		SPAG4
		NCKAP1
		MRPS35
		GUCY1B3
		SFSWAP
		TNK2
		MON2
		CDH3
		ARSF
		GPBP1
		DGAT2
		ZNF112
		CS
		MRPS24
		ELMO2
		WAPAL
		VMP1
		VMP1
		POLD1
		SEZ6
		EIF4B
		SLC6A16
		GLTSCR1
		RPL18
		CA11
		ISOC2
		U2AF2
		EPN1
		AHRR
		GSC2
		ZNF275
		MTMR1
		GPC1
		ADCK1
		HAGH
		RNF4
		CASP8
		LIMCH1
		ASUN
		TM7SF3
		DLX3
		SPA17
		TSPAN32
		WISP2
		DMRT3
		ST3GAL6
		ATP2C2
		NGFR
		CDON
		HIPK2
		TNPO3
		MEF2BNB-MEF2B
		MEF2BNB-MEF2B
		RFXANK
		TMEM161A
		LPAR2
		CTSA
		SUGP2
		SLC12A2
		SNX24
		EYA2
		CNN2
		ABCA7
		SNCAIP
		DDX20
		FAR2
		BCAS1
		POU1F1
		CHI3L2
		SBNO2
		PMS1
		CALCRL
		ANKS1A
		ZNF76
		SLC9A3R2
		NTHL1
		UHRF1BP1
		GNAI3
		IPO5
		OAT
		WDR3
		PKN2
		WDR18
		TRAM2
		GLP2R
		MCM10
		DGKA
		ERBB3
		ROPN1
		ANKRD44
		KARS
		ADAT1
		PDIA5
		TBC1D22B
		NDUFB4
		SPEN
		MYLK
		ZC3H15
		MAP2K4
		TMEM206
		SNAP91
		SLK
		CYB5R4
		COL17A1
		GSTO2
		TLE2
		ASB1
		FAM107B
		ME1
		TBC1D1
		MTHFD2
		SLC9A7
		FOXJ2
		YBX1
		PDE4A
		CTNNA2
		ELAVL1
		DIP2B
		SMARCD1
		KDM4A
		SLC9A3
		NGEF
		ASPM
		ELOVL1
		SPI1
		MPPED2
		CLDN18
		ZBTB11
		ATXN3
		GOLGA5
		FGFR2
		LRRC40
		ISOC1
		EML1
		TRMT11
		THUMPD1
		KIF26A
		ATG2B
		ARFGEF1
		ZFAT
		MTFR1
		STAG3
		FECH
		MYO9A
		DDX3Y
		PFKP
		IDI1
		SP100
		KLF6
		PPAP2A
		NEO1
		TRAM1
		PHKA1
		TNFRSF1A
		CACNB1
		EVI5
		STOML1
		PKM
		DHX29
		DNTTIP2
		METTL22
		TP53BP1
		TRO
		RRP15
		RHOA
		DHX8
		PRKCZ
		ZFY
		IARS2
		SYT1
		NAV3
		IDH3G
		ROGDI
		PDZD4
		ATP2B3
		ROCK1
		CBFB
		PDK3
		HYAL2
		HDAC4
		RASSF1
		FGFR3
		HEATR6
		COASY
		PLEKHH3
		MEF2A
		OTUD5
		TFE3
		TBC1D25
		ACSL4
		INPP5A
		GPKOW
		GRIPAP1
		FTSJ1
		PRR11
		ATP11A
		POLR1A
		LAPTM4A
		TTC7A
		IP6K2
		STON1-GTF2A1L
		SRBD1
		KIF2A
		RASGRP2
		IFT80
		SIRT2
		ERLEC1
		PPP2R5B
		PYGM
		PAGE1
		PITX1
		TRPC7
		MAST4
		SDK2
		ADAM7
		VPS35
		BCL3
		KCNAB2
		ABCC9
		GAL
		CLEC2D
		FUNDC1
		MAOB
		RORA
		TGFBR3
		KIAA1107
		PLA2G10
		PLA2G10
		HES2
		ATP1B3
		NEDD4
		PIGB
		MAPK6
		GNB5
		RAB27A
		CECR5
		UFD1L
		LRP6
		GUCY2C
		SCT
		PHRF1
		IKBKAP
		NUCB2
		PFN2
		PTPN3
		SPTB
		DAPP1
		FGF10
		TMEM260
		SMG6
		CLTCL1
		FSTL3
		DGCR2
		RNF126
		JMJD6
		POLB
		ST6GALNAC1
		WIPI1
		FRMPD1
		GBA2
		ASNS
		AP3M2
		CNGB1
		ST6GALNAC2
		CHAT
		PABPC1
		TESK2
		C16orf80
		PTPN21
		EIF2B3
		CAMK2A
		TCOF1
		CDC42
		OSBPL3
		EPHA8
		SLC12A3
		ATP2B1
		TRPM5
		NCK2
		MAP4K4
		MGAT4A
		WDR1
		MS4A12
		ARHGAP10
		RPS6KA2
		VASH1
		LMCD1
		WBSCR22
		SEL1L
		TRIP13
		ATP6AP1
		TCF3
		TRIB2
		DAZAP1
		MBD3
		PRLH
		HLTF
		FAM50A
		FAM3A
		CYBRD1
		CDH19
		PDCD2
		SLC6A15
		RDH11
		PRKACA
		LPHN1
		SPP2
		ACTN1
		RPS6KA6
		EPN2
		EPN2
		EPN2
		PTPN18
		ASIC4
		SPEG
		LNX1
		ALDH3A2
		TFRC
		SREBF1
		TRPC5
		AFF4
		UBE2D1
		MPP5
		RHOBTB1
		SMC1A
		HSD17B10
		MARK2
		HMMR
		FCGR2B
		NFATC3
		TRNT1
		ACADVL
		STK10
		ACAP1
		CRMP1
		EVC
		DERL2
		SIDT1
		NDE1
		MRVI1
		TMEM38A
		AP1M1
		PVR
		IKBKG
		XRCC1
		CYP2W1
		MCM2
		MOV10L1
		PANX2
		TP63
		ALPK1
		LLGL2
		PDE8A
		CLCN4
		NLE1
		SDHA
		SMARCE1
		FNDC8
		GSDMB
		KDM5A
		PPP2R3A
		FERMT2
		ABCB11
		DHRS9
		PTGS2
		IGF2BP2
		MAP3K13
		ST6GAL1
		TBX21
		FRY
		PICALM
		NSF
		GLI2
		MRPS34
		NOTCH3
		CLNS1A
		EED
		CDHR2
		SNCB
		TSG101
		C17orf85
		ATP2A3
		CA12
		MGLL
		NTN4
		BCS1L
		NUAK1
		DPP8
		SLC24A1
		ZNF532
		SCARF1
		LMAN1
		PTPLAD1
		IPCEF1
		ZZEF1
		ENO1
		SLC12A1
		C19orf10
		ANO8
		TUBE1
		ARHGEF10L
		TXK
		WSCD2
		KCNQ2
		TACR2
		ACTR6
		TIPIN
		EIF4G3
		SEMA3A
		SEMA3C
		TTC38
		ACAT1
		GRAMD4
		WNT8B
		ZNF638
		ZNF638
		SLC25A40
		TIMM21
		ADD2
		FGF4
		RASAL2
		VPS9D1
		ZNF37A
		MARK3
		SLC25A3
		FNDC3B
		FOSL2
		CACNG5
		FRYL
		TMEM131
		FSCN1
		ACTB
		MOCOS
		PLD1
		ATP12A
		WDR62
		DLG1
		RAB7A
		BCAP29
		SEC31B
		SART3
		ARHGAP15
		TUBA3D
		TUBA3D
		PAX2
		EXOSC7
		KIFAP3
		MKRN2
		MCM6
		REXO2
		RBM7
		RBMS2
		BAZ2A
		PTPN23
		MLH1
		UNG
		FMO4
		KLHL20
		RGS11
		SLC46A1
		PLXNA2
		SPAG5
		ANKRD13A
		TPD52
		ACACB
		TRAF4
		PAG1
		GPATCH1
		ICAM3
		NT5C2
		MCAM
		GPC4
		MBNL3
		CAMSAP3
		RAP1GAP
		ARHGEF1
		STXBP2
		MAP2K7
		NMRK2
		DGKD
		CTTNBP2
		ACTL6B
		RARB
		TOP2B
		TM9SF3
		NFKB2
		UBE2T
		PPP1R12B
		DNAJC10
		GTF3C1
		IL4R
		USP33
		PAK3
		CAPN6
		DCX
		SNRPA
		SPAG6
		DYNC1I2
		APBB1IP
		LRCH4
		TYR
		POLD3
		ACTN2
		CAPZB
		GPR137B
		PHF17
		SLC25A43
		FGFR1
		FKBP6
		GTF2I
		SMC1B
		FBLN1
		ITGA8
		CST7
		MAP2
		AMPH
		MCCC1
		LAMP3
		NEBL
		UBE2K
		PIK3C3
		N4BP2
		C12orf5
		TULP3
		SYNJ2
		ADCY2
		PPP2R5C
		RBFOX1
		GNB1
		EDN1
		MLLT10
		ZCWPW1
		ADCYAP1R1
		P2RY10
		ITM2A
		NRD1
		VDAC3
		PCM1
		TNRC6C
		DBC1
		ITCH
		PKD2L2
		TP53INP2
		SDF4
		BPIFB2
		TP73
		TOLLIP
		UBE2D4
		CLUL1
		CDH17
		THOC1
		FKBP7
		OSBPL6
		SLC1A3
		XRCC5
		LXN
		SP140
		TNS1
		REXO1
		REXO1
		SAR1A
		CDC14A
		RAPGEF3
		CEACAM1
		SENP1
		DUSP13
		CIC
		LIPE
		FDFT1
		PAFAH1B3
		OPHN1
		AFM
		KIF22
		SCGN
		LRRC16A
		PGM1
		DDX1
		DNM2
		EPB41L2
		RIMS1
		MOXD1
		STX7
		KEAP1
		DDX43
		PTPRH
		DCT
		CRYBG3
		EPHA6
		SCTR
		RFX3
		RIF1
		RAB21
		SLC4A4
		SMARCA2
		MID2
		PIH1D3
		COL5A3
		SRCAP
		KIAA0020
		CPB2
		CHRNA3
		KCNN2
		CNOT4
		PSEN1
		CPOX
		CLDND1
		MOK
		HSP90AA1
		IGSF9B
		IGSF9B
		CFHR2
		AP4E1
		RSBN1
		MAGI3
		AFP
		TCF7
		OSTM1
		CDH7
		PCNP
		EXD2
		ARG2
		MEF2C
		PTPRC
		CACNA1S
		PKP1
		UBA5
		STK17B
		CDC14B
		ZNF510
		LRP2
		JMJD4
		DUSP12
		AACS
		KIAA0141
		SLC13A1
		PCDHB4
		PCDHA6
		PCDHGA2
		HSPB11
		ATP8B1
		IL12RB2
		WDR70
		FYB
		MPP4
		STRADB
		BZW1
		PGR
		ME2
		C5orf22
		CCNT2
		FAM135A
		COL19A1
		EPB41L3
		DLG3
		KCNK2
		SERTAD4
		TRAF5
		MRPL22
		GEMIN5
		OPRK1
		SEMA5B
		GSK3B
		ITGB5
		ERC1
		XPO1
		RNF13
		PALB2
		DOPEY1
		BCKDHB
		KAT6A
		ZCCHC6
		ULK2
		GRHL2
		TNPO1
		P2RX5
		ITGAE
		DIS3
		TDRD3
		NUFIP1
		PDS5B
		OXCT1
		RRAGB
		EPYC
		CYLD
		SLC27A5
		ZNF324
		ZNF671
		ZNF446
		ZNF8
		RPS5
		FAT1
		YTHDC1
		CHMP2B
		SMAP2
		PPIE
		ZMPSTE24
		STARD7
		NOA1
		REST
		HAL
		SSH1
		GSTP1
		APLP2
		KIAA1467
		SLCO1A2
		WBP11
		EIF3I
		NKAIN1
		COL16A1
		TXLNA
		APOB
		NCOA1
		AGBL5
		EFR3B
		KIF3C
		RAB10
		HADHA
		MAPRE3
		CAD
		CD59
		CD82
		BCORL1
		ATRX
		TAF9
		FCN1
		MYNN
		MECOM
		PREP
		SEH1L
		WDR47
		WDFY1
		SLC25A24
		MAP3K4
		PILRA
		IGSF9
		ABCB1
		ZNF213
		AKR1B1
		CPNE3
		RRN3
		CTTN
		WNT11
		MTIF2
		DDHD2
		TTC39A
		EPS15
		ORC1
		MGST2
		CHERP
		ATG16L1
		USP40
		POMGNT1
		MAST2
		DNAJA1
		B4GALT1
		CHMP5
		AQP6
		DIMT1
		FOLH1
		FOLH1
		EIF2AK1
		NME8
		EPDR1
		SNX10
		SEPHS1
		MRPL28
		HBQ1
		ITPKC
		CEACAM6
		FAT2
		RBM22
		TMED2
		ERO1LB
		ZFAND6
		HSD17B2
		TXLNG
		PPEF1
		LAT2
		HUWE1
		ZW10
		ALG9
		MYBPC2
		NOX4
		ACOX3
		PPP1R15A
		HSD17B14
		TRIP6
		ACHE
		FTL
		SRRT
		BAX
		NLK
		PIGS
		ADAMTS2
		TMPRSS11E
		ATXN7L3
		PGS1
		PSMC5
		UIMC1
		MMP2
		MT3
		LPCAT2
		GNAO1
		OGFOD1
		SH3BP2
		NOP14
		ADD1
		TXNDC16
		C14orf166
		NID2
		GMCL1
		SF3B2
		KLHL42
		GNAS
		DNM1L
		PTHLH
		PHACTR3
		ERGIC2
		TFAP2C
		AURKA
		CASS4
		PIR
		RFX2
		SLC6A14
		SULT2B1
		CNOT3
		PTPN4
		DDX18
		KHSRP
		GNA11
		ASAP3
		EDEM2
		DNMT3B
		REM1
		TPX2
		PDRG1
		SLC15A1
		DOCK9
		ANKRD10
		TGDS
		DOCK3
		C3orf18
		COQ9
		TMEM40
		KIF9
		ARHGAP28
		DEFB127
		PPP1R13B
		ATRN
		SMOX
		SIGLEC1
		FKBP1A
		NSFL1C
		SLC4A11
		C20orf194
		ZNF343
		CPXM1
		MAVS
		LZTS3
		XRN2
		TESC
		SNX5
		MAPKAPK5
		P2RX7
		ESF1
		RBBP9
		ANAPC5
		SLC23A2
		SLC24A6
		TMEM230
		C20orf26
		LHX5
		TASP1
		OAS1
		GCN1L1
		RPLP0
		PXN
		SIRT4
		RPH3A
		KIF16B
		TRMT6
		CHGB
		PEBP1
		TBX5
		BRAP
		ERP29
		NOS1
		FUS
		IGBP1
		FXYD5
		GRAMD1A
		FXYD3
		HEPH
		CDIP1
		CMTM1
		GANAB
		GMIP
		RBM41
		BIRC5
		LAG3
		MLF2
		OTUB2
		DDX24
		ARHGAP4
		ANKRD24
		DHX32
		RCOR1
		GPATCH2L
		LTBP4
		BLVRB
		SLC9A1
		SPTLC1
		PAPOLA
		CCNK
		YPEL3
		MRPS33
		NUDC
		MAEA
		ICAM1
		STRN4
		IRAK3
		LYZ
		SI
		MUL1
		TFAP4
		PDCD7
		SPG21
		FETUB
		DNAJB11
		LEPREL1
		CHRD
		FLT3LG
		RAB11FIP3
		GNPTG
		ZNF268
		GOLGA3
		PABPC4
		CD209
		CERS4
		MCOLN1
		USP48
		EFNB1
		PDPR
		AARS
		GLG1
		KIF4A
		TNRC6A
		FCGBP
		PLEKHG2
		PITPNM2
		EXOC1
		RBM27
		POU4F3
		OSBPL8
		DTX2
		NLRC4
		PUS7
		LAMB4
		NRCAM
		LAMB1
		SLC26A4
		SLC26A3
		DLD
		WDR7
		TXNL1
		IL5RA
		CMTM6
		ITGA6
		RAPGEF4
		MLTK
		SMPX
		FH
		SEL1L3
		TF
		CDV3
		MYO15A
		ALKBH5
		APOH
		NLRP1
		SPAG7
		ORC6
		ZFHX4
		SLC17A6
		CPA1
		ZC3HC1
		ESR1
		RGS17
		ANGPT2
		CD200
		CCDC80
		CMA1
		PSME1
		PPP2R3C
		HAUS4
		HAUS4
		JPH4
		MYH7
		CEBPE
		OSGEP
		SLC22A17
		RNF31
		SCFD1
		G2E3
		HECTD1
		HNRNPC
		RPGRIP1
		SUPT16H
		TOX4
		GEMIN2
		TGM1
		DAZL
		SEMA6A
		TRPM7
		WDR76
		CAPN3
		SNAP23
		TBX15
		PHGDH
		COL9A3
		EZR
		MYL6
		TEKT2
		RFFL
		MFSD11
		DPYSL2
		GPATCH2
		NUP50
		CDC45
		COMT
		CECR1
		VNN3
		ECHDC1
		LRRFIP2
		SEC22C
		XYLB
		HDAC6
		GABRP
		CDC6
		UPRT
		CDC23
		AAAS
		CBX5
		FMO2
		SUCO
		MSH2
		MAP3K1
		DHPS
		HOOK2
		NXPE1
		ARCN1
		EPB41L4B
		TMEM38B
		PSMD5
		PTGS1
		CRAT
		SH2D3C
		NANS
		TBC1D2
		DFNB31
		CWF19L1
		SEMA4G
		BTAF1
		IKZF5
		BLNK
		CYP26A1
		TDRD1
		SORBS1
		CRTAC1
		BAMBI
		MYO3A
		WAC
		CREM
		NUBP2
		TPSD1
		C19orf77
		HIVEP1
		TREM2
		KCNK16
		FKBP5
		SRPK1
		BRPF3
		MRPS18A
		PGC
		EFHC1
		HSP90AB1
		CDC5L
		ITPR3
		ZNF184
		DSP
		SIRT1
		HNRNPH3
		IFT74
		JAK2
		ABL1
		ACOT7
		SH3GLB1
		CDC7
		SYDE2
		PCSK5
		SCD
		TMED1
		ABLIM1
		ERMP1
		RAB18
		NRP1
		PRTFDC1
		PALMD
		TSPAN15
		H2AFY2
		FAM21A
		FAM21A
		MAST3
		MZF1
		OCEL1
		MYO9B
		KCNK6
		CATSPERG
		PSMD8
		HSD3B7
		SETD1A
		BCL7C
		EFNA2
		ATP5D
		C19orf26
		PCDH11Y
		PCDH11Y
		AMELY
		IGFALS
		HNRNPM
		2013-03-02
		NDUFB7
		TECR
		TIMM13
		CDC34
		MISP
		POLRMT
		CDHR5
		IZUMO4
		GADD45B
		PALM
		IGF2-AS
		MKNK2
		ARVCF
		TRMT2A
		RANBP1
		ZDHHC8
		KLHL22
		MED15
		SERPIND1
		SNAP29
		CRKL
		MMP11
		CECR2
		SMARCB1
		P2RX6
		DERL3
		SLC7A4
		BCL2L13
		DDT
		GSTT2
		OSM
		CABIN1
		TBC1D10A
		SUSD2
		SF3A1
		GGT5
		RNF215
		PPIL2
		UPB1
		YPEL1
		SNRPD3
		MAPK1
		GGT1
		GGT1
		PRODH
		PPM1F
		SLC35E4
		TOP3B
		CRYBB3
		DGCR14
		DGCR14
		MFNG
		CARD10
		LRP5L
		SLC25A1
		ADRBK2
		PLA2G3
		LGALS2
		GGA1
		HIRA
		SH3BP1
		LGALS1
		HPS4
		PIK3IP1
		SRRD
		TRIOBP
		TFIP11
		GCAT
		GGTLC2
		EIF3L
		NHP2L1
		MICALL1
		POLR2F
		SOX10
		CCDC134
		DEPDC5
		PICK1
		TTC28
		CENPM
		2013-09-03
		SLC5A1
		SLC5A4
		KDELR3
		CYP2D6
		DDX17
		DMC1
		TCF20
		HSCB
		TOMM22
		RTDR1
		XBP1
		RTCB
		JOSD1
		FBXO7
		GTPBP1
		POLDIP3
		TIMP3
		PPP6R2
		SUN2
		CYB5R3
		DNAL4
		C22orf31
		RHBDD3
		PACSIN2
		TTLL1
		HMGXB4
		TOM1
		NEFH
		CHKB
		HMOX1
		MCAT
		THOC5
		MCM5
		APOBEC3H
		ARSA
		TSPO
		RASD2
		TTLL12
		CBX7
		PDGFB
		ACR
		CABP7
		RPL3
		RPL3
		RPL3
		ZMAT5
		RBFOX2
		SYNGR1
		TAB1
		ASCC2
		MTMR3
		SMCR7L
		APOL4
		PNPLA5
		APOL1
		MYH9
		SAMM50
		TXN2
		FOXRED2
[truncated: 14,227 more rows]
