# Supplementary material for: Force Engages Vinculin and Promotes Tumor Progression by Enhancing PI3K Activation of Phosphatidylinositol (3,4,5)-Triphosphate
Source: Oxford University Press journal article supplement (doi:10.1158/0008-5472.can-13-3698), 2014-09-01
Supplement: 00085472can133698-sup-124694_1_supp_2368839_n1zx1k.xls [file 00085472can133698-sup-124694_1_supp_2368839_n1zx1k.xls]

## Sheet: Sheet1
Cancer Type	Unbiased Matched Normal Tissue
breast.cancer	breast_glandular cells
carcinoid	pancreas_islets of Langerhans
cervical.cancer	uterus, pre-menopause_cells in endometrial stroma
colorectal.cancer	appendix_glandular cells
endometrial.cancer	uterus, pre-menopause_glandular cells
glioma	uterus, pre-menopause_cells in endometrial stroma
head.and.neck.cancer	oral mucosa_squamous epithelial cells
liver.cancer	liver_hepatocytes
lung.cancer	uterus, pre-menopause_cells in endometrial stroma
lymphoma	spleen_cells in white pulp
melanoma	skin_melanocytes
ovarian.cancer	breast_glandular cells
pancreatic.cancer	uterus, pre-menopause_glandular cells
prostate.cancer	prostate_glandular cells
renal.cancer	uterus, pre-menopause_cells in endometrial stroma
skin.cancer	skin_Langerhans
stomach.cancer	uterus, post-menopause_glandular cells
testis.cancer	uterus, pre-menopause_cells in endometrial stroma
thyroid.cancer	thyroid gland_glandular cells
urothelial.cancer	oral mucosa_squamous epithelial cells
						1.6
